# Supplementary material for: Phytochemical composition and the cholinesterase and xanthine oxidase inhibitory properties of seed extracts from theWashingtonia filiferapalm fruit
Source: Royal Society of Chemistry journal article supplement (doi:10.1039/c9ra02928a), 2019-01-01
Supplement: c9ra02928a1.pdf [file c9ra02928a1.pdf]

## Supporting Information

### **Phytochemical composition, cholinesterase and xanthine oxidase inhibitory properties of seed extracts from *Washingtonia filifera* palm fruit**

Sonia Floris<sup>a</sup>, Antonella Fais<sup>\*a</sup>, Antonella Rosa<sup>b</sup>, Alessandra Piras<sup>c</sup>, Hanen Marzouki<sup>d</sup>, Rosaria Medda<sup>a</sup>, Ana M. González-Paramás<sup>e</sup>, Amit Kumar<sup>f</sup>, Celestino Santos-Buelga<sup>e</sup>, Benedetta Era<sup>a</sup>.

<sup>a</sup> *Department of Life and Environmental Sciences, University of Cagliari, Monserrato (CA), Italy.*

<sup>b</sup> *Department of Biomedical Sciences, University of Cagliari, Monserrato (CA), Italy.*

<sup>c</sup> *Department of Chemical and Geological Sciences, University of Cagliari, Monserrato (CA), Italy.*

<sup>d</sup> *Laboratory of Transmissible Diseases and Biologically Active Substances, Faculty of Pharmacy, University of Monastir, Tunisia.*

<sup>e</sup> *Grupo de Investigación en Polifenoles (GIP-USAL), Universidad de Salamanca, Spain.*

<sup>f</sup> *Department of Electrical and Electronic Engineering, University of Cagliari, Cagliari, Italy.*

\*Corresponding author. Department of Life and Environmental Sciences, University of Cagliari, Monserrato (CA), Italy; phone number: +39 0706754506; email: fais@unica.it (A. Fais)

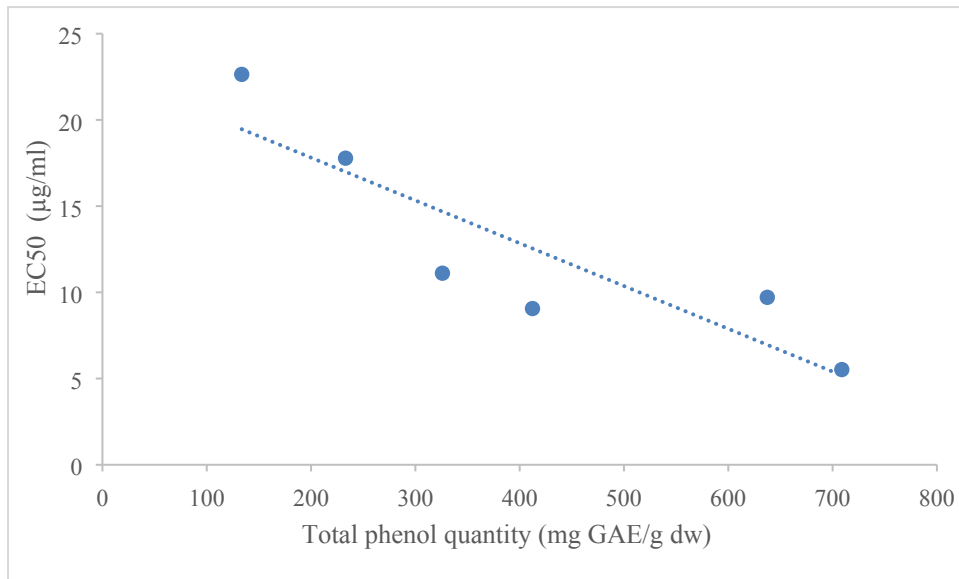

Figure S1. Correlation coefficient ( $R^2$ ) of total phenol content in *W. filifera* seed extracts with their antioxidant activity (ABTS)

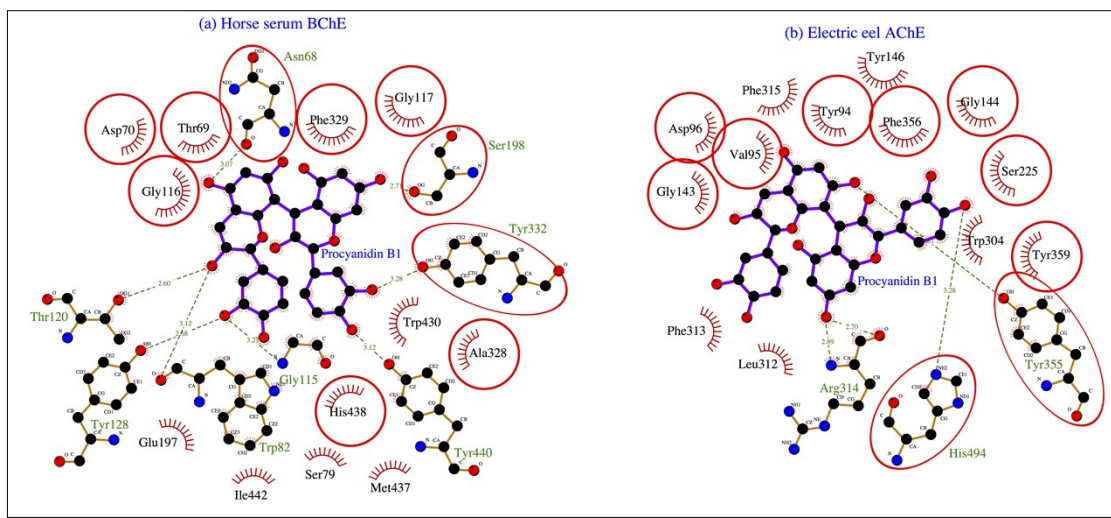

Figure S2. Interaction picture of ligand procyanidin B1, when bound to: (a) BChE protein and (b) AChE protein. The conserved interacting residues between the two protein complexes are circled in red. Hydrophobic interactions are represented by red spokes radiating towards the interacting ligand atoms, while hydrogen-bonded interaction with dashed green line.
